# Supplementary material for: CABS-dock web server for the flexible docking of peptides to proteins without prior knowledge of the binding site
Source: PubMed Central journal article supplement (PMC4489223; doi:10.1093/nar/gkv456), 2015-05-05
Supplement: supp_gkv456_nar-00687-web-b-2015-File005.pdf [file supp_gkv456_nar-00687-web-b-2015-File005.pdf]

## Supplementary data

### Summary of the CABS force-field

Detailed description of the CABS force-field can be found in the ref. [Kolinski, A. (2004) Protein modeling and structure prediction with a reduced representation. *Acta biochimica Polonica*, **51**, 349-371]. For readers' convenience it is summarized below.

The CABS force field is a knowledge-based statistical potential. It has been derived from regularities observed in known protein structures (deposited in the Protein Data Bank). Total energy of the modeled system consists of the following terms:

- **Short-range (along the sequence) sequence-independent interactions**  
This term is in fact a set of conditions and constraints imposed on the virtual Ca-Ca bonds to enforce protein-like behavior of the otherwise very flexible Ca trace (e.g.  $3.28 \text{ \AA} < ||\mathbf{R}_i - \mathbf{R}_{i+1}|| < 4.27 \text{ \AA}$ , where  $\mathbf{R}_i$  is a coordinate vector of the Ca atom in the i-th residue).
- **Short-range (along the sequence) sequence-dependent interactions**  
This potential is responsible for local conformation of short (3-5 amino acids) fragments of the protein chain. It depends on types of the amino acids which compose the fragment, local secondary structure and chirality. It is stored in histograms of distances between i-th and i+2<sup>nd</sup>, i+3<sup>rd</sup> and i+4<sup>th</sup> Ca atoms. For a given fragment the energetic reward is exponentially proportional to the frequency of occurrence in known structures of the respective Ca-Ca distance observed in that fragment.
- **Long-range (along the sequence) sequence-independent interactions**  
This potential includes the terms responsible for the short-distance repulsion (excluded volume) and a set of geometric terms which define hydrogen bonds between backbone atoms
- **Long-range (along the sequence) sequence-dependent interactions**  
This is a two-body, context-dependent contact potential responsible for side chains' interactions. It is stored in multi-dimensional arrays which contain cut-off values of distances between contacting side chain pseudo atoms and energetic reward/penalty for contact occurrence. The arrays are indexed by the types of interacting residues (ALA, GLY, ...), local conformation of the backbone in both interacting residues (compact helix- and turn-like or open sheet- and coil-like) and relative orientation of the side chains of the interacting residues (parallel, intermediate and anti-parallel). This potential implicitly considers also the electrostatic interactions, disulphide bridges, hydrophobic effect of the solvent and hydrogen bonds between side chain atoms.
- **Centrosymmetric potential**  
This term is responsible for the sphere-like shape of the protein. Diameter of the protein is estimated from the number of residues it contains. Energetic reward/penalty per residue depends on its distance from the proteins' geometric center i.e. polar residues are supposed to be located on the surface of the protein and non-polar constitute its hydrophobic core.

Full set of the CABS parameters is available from the laboratory website <http://biocomp.chem.uw.edu.pl/>

Figure S1. Flow-chart of the CABS-dock protocol.

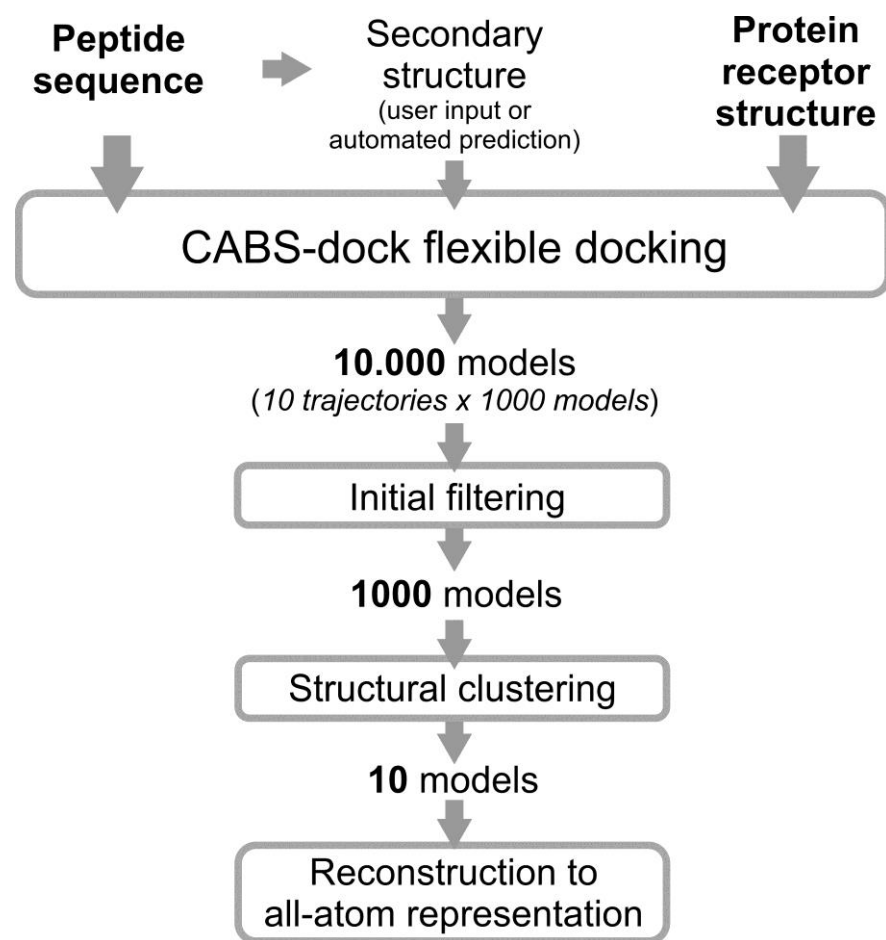

**Table S1. CABS-dock performance for 103 bound cases (listed in rows) in 3 independent prediction runs (shown in separate columns). The table shows the lowest ligand-RMSD values (calculated on the peptide only after superimposition of the receptor structures) among: all 10,000 models (all), top 1000 models (top 1k, selected during filtering and clustering procedure), top 100 models (top 100, selected through further clustering) and top 10 final models (top 10). Last column shows the lowest RMSD values obtained in three prediction runs.**

| receptor<br>pdb id | receptor<br>length (AA) | peptide<br>length (AA) | Run 1 |        |         |        | Run 2 |        |         |        | Run 3 |        |         |        | best from all runs |        |         |        |
|--------------------|-------------------------|------------------------|-------|--------|---------|--------|-------|--------|---------|--------|-------|--------|---------|--------|--------------------|--------|---------|--------|
|                    |                         |                        | all   | top 1k | top 100 | top 10 | all   | top 1k | top 100 | top 10 | all   | top 1k | top 100 | top 10 | all                | top 1k | top 100 | top 10 |
| 1awr               | 164                     | 6                      | 1.51  | 2.48   | 2.92    | 2.83   | 1.99  | 1.99   | 2.82    | 5.52   | 1.86  | 1.89   | 2.83    | 3.97   | 1.51               | 1.89   | 2.82    | 2.83   |
| 1ce1               | 431                     | 8                      | 1.73  | 2.14   | 3.34    | 4.23   | 2.76  | 3.31   | 3.76    | 5.45   | 3.12  | 3.48   | 4.32    | 3.86   | 1.73               | 2.14   | 3.34    | 3.86   |
| 1cka               | 57                      | 9                      | 3.45  | 3.54   | 4.73    | 5.03   | 3.4   | 3.73   | 4.36    | 5.08   | 3.09  | 3.37   | 4.03    | 4.45   | 3.09               | 3.37   | 4.03    | 4.45   |
| 1czy               | 168                     | 7                      | 2.68  | 4.51   | 11.58   | 18.99  | 1.91  | 2.21   | 2.4     | 3.05   | 2.39  | 3.37   | 6.06    | 11.05  | 1.91               | 2.21   | 2.4     | 3.05   |
| 1d4t               | 104                     | 11                     | 4.8   | 5.61   | 7.37    | 8.17   | 1.97  | 1.97   | 2.2     | 2.63   | 2.15  | 2.97   | 3.18    | 3.85   | 1.97               | 1.97   | 2.2     | 2.63   |
| 1ddv               | 104                     | 6                      | 2.52  | 2.94   | 3.97    | 3.82   | 3.24  | 3.88   | 4.75    | 4.07   | 3.08  | 3.53   | 4.7     | 6.92   | 2.52               | 2.94   | 3.97    | 3.82   |
| 1dkx               | 219                     | 7                      | 8.49  | 8.49   | 9.11    | 8.84   | 7.93  | 7.93   | 8.19    | 9.4    | 9.59  | 9.74   | 10.29   | 12.78  | 7.93               | 7.93   | 8.19    | 8.84   |
| 1eg4               | 260                     | 13                     | 6.73  | 8.61   | 8.97    | 11.08  | 9.57  | 11.38  | 12.26   | 16.18  | 6.57  | 13.12  | 13.39   | 13.7   | 6.57               | 8.61   | 8.97    | 11.08  |
| 1elw               | 117                     | 8                      | 1.96  | 1.96   | 2.53    | 3.8    | 2.18  | 2.94   | 3.3     | 4.87   | 2.56  | 2.56   | 3.38    | 4.57   | 1.96               | 1.96   | 2.53    | 3.8    |
| 1er8               | 330                     | 8                      | 6.33  | 6.92   | 6.92    | 6.92   | 7.11  | 7.11   | 7.78    | 8.68   | 6.39  | 6.39   | 6.9     | 8.9    | 6.33               | 6.39   | 6.9     | 6.92   |
| 1gyb               | 122                     | 5                      | 4.53  | 8.62   | 11.55   | 16.66  | 4.79  | 7.5    | 14.76   | 15.15  | 4.98  | 7.67   | 10.99   | 14.83  | 4.53               | 7.5    | 10.99   | 14.83  |
| 1h6w               | 151                     | 10                     | 6.1   | 18.63  | 19.07   | 25.35  | 8.22  | 8.22   | 19.27   | 20.32  | 9.46  | 10.2   | 12.11   | 25.23  | 6.1                | 8.22   | 12.11   | 20.32  |
| 1hc9               | 74                      | 13                     | 6.87  | 10.59  | 12.91   | 14.26  | 6.21  | 6.52   | 7.17    | 7.94   | 6.67  | 11.81  | 13.69   | 14.5   | 6.21               | 6.52   | 7.17    | 7.94   |
| 1i8k               | 225                     | 10                     | 3.6   | 4      | 4.04    | 8.5    | 5.53  | 5.82   | 7.2     | 7.64   | 4.92  | 5.5    | 6.94    | 7.8    | 3.6                | 4      | 4.04    | 7.64   |
| 1iak               | 367                     | 13                     | 3.4   | 4.19   | 4.19    | 5.13   | 5.56  | 8.19   | 10.16   | 18.04  | 3.98  | 3.98   | 5.2     | 5.85   | 3.4                | 3.98   | 4.19    | 5.13   |
| 1ihj               | 94                      | 5                      | 2.58  | 3.71   | 4.42    | 6.99   | 2.7   | 2.72   | 5.29    | 6.5    | 2.17  | 4.84   | 5.67    | 7.03   | 2.17               | 2.72   | 4.42    | 6.5    |
| 1jbu               | 239                     | 15                     | 7.73  | 9.67   | 13.45   | 19.68  | 9.39  | 14.52  | 14.52   | 26.58  | 7.39  | 13.46  | 21.87   | 24.87  | 7.39               | 9.67   | 13.45   | 19.68  |
| 1jd5               | 105                     | 8                      | 2.85  | 2.85   | 5.88    | 16.12  | 5.31  | 13.06  | 15.47   | 20.07  | 6.04  | 9      | 11.69   | 15.18  | 2.85               | 2.85   | 5.88    | 15.18  |
| 1jwg               | 140                     | 5                      | 2.53  | 3.48   | 4.41    | 5.27   | 2.29  | 2.29   | 3.92    | 6.75   | 2.38  | 2.38   | 4.21    | 5.87   | 2.29               | 2.29   | 3.92    | 5.27   |
| 1kl3               | 120                     | 6                      | 2.6   | 3.51   | 5.14    | 5.33   | 2.91  | 4.33   | 4.82    | 5.92   | 2.45  | 4.29   | 4.92    | 5.21   | 2.45               | 3.51   | 4.82    | 5.21   |
| 1klu               | 369                     | 15                     | 3.57  | 3.89   | 4.79    | 5.86   | 3.64  | 3.91   | 4.5     | 5.3    | 3.75  | 3.8    | 5.02    | 6.27   | 3.57               | 3.8    | 4.5     | 5.3    |
| 1lvm               | 229                     | 7                      | 6.13  | 7.88   | 17.09   | 13.47  | 5.68  | 9.59   | 12.52   | 14.37  | 5.42  | 6.07   | 14.41   | 15.07  | 5.42               | 6.07   | 12.52   | 13.47  |
| 1mfg               | 95                      | 9                      | 4.62  | 4.86   | 6.78    | 9.49   | 2.99  | 4.6    | 10.1    | 7.37   | 3.71  | 3.71   | 7.25    | 6.78   | 2.99               | 3.71   | 6.78    | 6.78   |
| 1mvu               | 333                     | 13                     | 4.26  | 4.26   | 5.47    | 9.85   | 3.74  | 4.33   | 4.89    | 5.29   | 3.29  | 4.84   | 6.58    | 7.77   | 3.29               | 4.26   | 4.89    | 5.29   |
| 1n12               | 136                     | 11                     | 8.43  | 8.43   | 9.4     | 12.11  | 8.31  | 8.31   | 8.72    | 10.46  | 9.46  | 9.89   | 12.78   | 14.93  | 8.31               | 8.31   | 8.72    | 10.46  |
| 1n7f               | 86                      | 8                      | 4.18  | 7.13   | 7.81    | 9.15   | 4.22  | 7.07   | 12.76   | 12.42  | 4.72  | 6.2    | 10.91   | 13.1   | 4.18               | 6.2    | 7.81    | 9.15   |
| 1nln               | 203                     | 11                     | 3.34  | 3.62   | 3.97    | 5.23   | 5.57  | 7.07   | 8.61    | 12.81  | 3.07  | 3.7    | 3.74    | 12.51  | 3.07               | 3.62   | 3.74    | 5.23   |
| 1nq7               | 244                     | 10                     | 2.85  | 2.85   | 2.85    | 8.31   | 1.03  | 1.03   | 1.11    | 4.66   | 1.17  | 1.17   | 2.47    | 2.73   | 1.03               | 1.03   | 1.11    | 2.73   |
| 1ntv               | 152                     | 10                     | 3.14  | 3.14   | 5.92    | 10     | 2.89  | 2.89   | 3.71    | 5.28   | 3.6   | 4.3    | 5.39    | 14.3   | 2.89               | 2.89   | 3.71    | 5.28   |
| 1nvr               | 264                     | 5                      | 5.24  | 6.2    | 9.11    | 8.68   | 2.83  | 2.83   | 6.39    | 7.5    | 1.68  | 1.68   | 4.06    | 4.15   | 1.68               | 1.68   | 4.06    | 4.15   |
| 1nx1               | 173                     | 11                     | 3.03  | 3.2    | 3.7     | 4.2    | 2.82  | 2.98   | 3.26    | 4.68   | 2.92  | 2.94   | 3.33    | 4.95   | 2.82               | 2.94   | 3.26    | 4.2    |

| receptor<br>pdb id | receptor<br>length (AA) | peptide<br>length (AA) | Run 1 |        |         |        | Run 2 |        |         |        | Run 3 |        |         |        | best from all runs |        |         |        |
|--------------------|-------------------------|------------------------|-------|--------|---------|--------|-------|--------|---------|--------|-------|--------|---------|--------|--------------------|--------|---------|--------|
|                    |                         |                        | all   | top 1k | top 100 | top 10 | all   | top 1k | top 100 | top 10 | all   | top 1k | top 100 | top 10 | all                | top 1k | top 100 | top 10 |
| 1oai               | 59                      | 9                      | 3.81  | 4.86   | 5.27    | 6.84   | 3.04  | 3.56   | 5.54    | 6.68   | 3.23  | 4.75   | 6.18    | 6.53   | 3.04               | 3.56   | 5.27    | 6.53   |
| 1ou8               | 106                     | 8                      | 4.17  | 4.17   | 5.93    | 9.04   | 4.86  | 7.38   | 9.21    | 10.79  | 2.98  | 3.97   | 5.65    | 5.56   | 2.98               | 3.97   | 5.65    | 5.56   |
| 1pz5               | 435                     | 8                      | 4.58  | 4.58   | 5.8     | 5.63   | 4.69  | 5.18   | 5.32    | 5.22   | 5.02  | 5.97   | 7.73    | 8.22   | 4.58               | 4.58   | 5.32    | 5.22   |
| 1qkz               | 219                     | 10                     | 5     | 6.45   | 10.31   | 15.24  | 6.71  | 7.72   | 11.97   | 13.27  | 6.96  | 6.96   | 6.96    | 10.69  | 5                  | 6.45   | 6.96    | 10.69  |
| 1rxz               | 245                     | 11                     | 6.76  | 6.76   | 11.68   | 13.38  | 4.46  | 5.22   | 8.5     | 11.28  | 3.54  | 3.9    | 6.16    | 6.11   | 3.54               | 3.9    | 6.16    | 6.11   |
| 1se0               | 97                      | 7                      | 6.16  | 7.78   | 11.06   | 17.95  | 4.05  | 4.05   | 9.08    | 7.55   | 5.34  | 7.02   | 9       | 9.06   | 4.05               | 4.05   | 9       | 7.55   |
| 1sfi               | 223                     | 14                     | 7.8   | 7.8    | 10.63   | 13.04  | 7.18  | 7.18   | 7.36    | 7.77   | 6.74  | 8.53   | 8.78    | 11.51  | 6.74               | 7.18   | 7.36    | 7.77   |
| 1ssh               | 60                      | 11                     | 3     | 4.79   | 5.35    | 7.05   | 4.19  | 4.67   | 5.44    | 5.41   | 3.74  | 4.32   | 5.33    | 5.68   | 3                  | 4.32   | 5.33    | 5.41   |
| 1svz               | 232                     | 6                      | 2.98  | 2.98   | 3.82    | 6.82   | 2.17  | 2.17   | 3.77    | 5.13   | 2.8   | 4.43   | 5.05    | 5.19   | 2.17               | 2.17   | 3.77    | 5.13   |
| 1t4f               | 88                      | 9                      | 2.59  | 3.1    | 3.82    | 4.58   | 2.81  | 2.88   | 2.93    | 3.02   | 2.78  | 2.79   | 3.43    | 4.23   | 2.59               | 2.79   | 2.93    | 3.02   |
| 1t7r               | 250                     | 10                     | 1.94  | 2.15   | 2.52    | 3.35   | 1.61  | 2.05   | 2.05    | 2.13   | 1.73  | 1.92   | 2.92    | 1.88   | 1.61               | 1.92   | 2.05    | 1.88   |
| 1tp5               | 115                     | 6                      | 4.28  | 7.19   | 9.28    | 8.47   | 1.68  | 1.73   | 2.64    | 3.57   | 1.15  | 1.45   | 2.46    | 3.76   | 1.15               | 1.45   | 2.46    | 3.57   |
| 1tw6               | 95                      | 6                      | 3.31  | 3.93   | 10.22   | 8.47   | 3.27  | 5.75   | 10.99   | 17.83  | 4.33  | 7.61   | 11.44   | 7.22   | 3.27               | 3.93   | 10.22   | 7.22   |
| 1u00               | 227                     | 9                      | 8.89  | 8.89   | 10.59   | 11.43  | 9.67  | 10.85  | 11.07   | 11.86  | 8.95  | 9.28   | 9.28    | 11.21  | 8.89               | 8.89   | 9.28    | 11.21  |
| 1u8i               | 441                     | 7                      | 5.85  | 13.62  | 19.63   | 19.99  | 6.5   | 9.66   | 13.42   | 13.84  | 5.75  | 9.79   | 10.1    | 16.59  | 5.75               | 9.66   | 10.1    | 13.84  |
| 1u9l               | 138                     | 7                      | 10.81 | 10.81  | 11.61   | 12.46  | 8.77  | 8.77   | 8.96    | 9.25   | 10.06 | 10.06  | 10.76   | 10.64  | 8.77               | 8.77   | 8.96    | 9.25   |
| 1uj0               | 58                      | 9                      | 3.44  | 3.53   | 4.29    | 5.19   | 3.49  | 3.49   | 4.57    | 4.83   | 4.1   | 4.71   | 4.9     | 5.37   | 3.44               | 3.49   | 4.29    | 4.83   |
| 1vzq               | 250                     | 6                      | 2.98  | 4.02   | 6.61    | 10.51  | 2.76  | 4.5    | 5.03    | 6.71   | 3.73  | 5.85   | 6.35    | 7.21   | 2.76               | 4.02   | 5.03    | 6.71   |
| 1w9e               | 164                     | 5                      | 3.77  | 6.17   | 11.09   | 17.41  | 5.4   | 5.76   | 9.04    | 16.41  | 4.19  | 13.05  | 16.34   | 17.86  | 3.77               | 5.76   | 9.04    | 16.41  |
| 1x2r               | 290                     | 9                      | 4.95  | 5.02   | 5.04    | 5.1    | 2.89  | 4.85   | 6.54    | 7.13   | 3.89  | 5      | 5.78    | 7.1    | 2.89               | 4.85   | 5.04    | 5.1    |
| 1xoc               | 504                     | 9                      | 19.49 | 19.49  | 20.94   | 21.66  | 17.64 | 17.97  | 18.06   | 20.33  | 18.15 | 18.15  | 18.15   | 19.29  | 17.64              | 17.97  | 18.06   | 19.29  |
| 1ymt               | 235                     | 10                     | 2.98  | 2.99   | 4.12    | 5.98   | 2.54  | 2.77   | 2.89    | 3.28   | 2.79  | 3.53   | 3.72    | 4.54   | 2.54               | 2.77   | 2.89    | 3.28   |
| 1yph               | 228                     | 10                     | 4.23  | 5.19   | 5.19    | 7.27   | 4.03  | 4.03   | 4.66    | 4.63   | 3.27  | 12.4   | 13.23   | 13.44  | 3.27               | 4.03   | 4.66    | 4.63   |
| 1yuc               | 240                     | 14                     | 3.29  | 5.35   | 6.96    | 7.92   | 2.89  | 3.68   | 5.25    | 6.13   | 4.83  | 8.22   | 12.26   | 13     | 2.89               | 3.68   | 5.25    | 6.13   |
| 1ywo               | 55                      | 10                     | 2.97  | 5.09   | 5.98    | 7.62   | 3.95  | 4.25   | 6.8     | 8.07   | 4.21  | 4.6    | 6.01    | 6.46   | 2.97               | 4.25   | 5.98    | 6.46   |
| 1z9o               | 238                     | 9                      | 4.61  | 6.68   | 7.19    | 8.37   | 5.18  | 6.44   | 6.83    | 8.28   | 5.12  | 6.03   | 7.31    | 8.63   | 4.61               | 6.03   | 6.83    | 8.28   |
| 1zuk               | 130                     | 11                     | 2.93  | 3.48   | 4.53    | 5.19   | 3.18  | 3.18   | 4.58    | 4.43   | 3.2   | 3.38   | 3.64    | 4.46   | 2.93               | 3.18   | 3.64    | 4.43   |
| 2a3i               | 253                     | 12                     | 3.59  | 4.14   | 5.31    | 5.25   | 1.7   | 2.56   | 3.54    | 4.02   | 1.68  | 2.1    | 2.1     | 5.49   | 1.68               | 2.1    | 2.1     | 4.02   |
| 2ai4               | 111                     | 8                      | 5.94  | 8.48   | 8.51    | 9.49   | 9.6   | 11.5   | 14.81   | 15.92  | 7.93  | 11     | 13.87   | 14.01  | 5.94               | 8.48   | 8.51    | 9.49   |
| 2ak5               | 64                      | 8                      | 3.59  | 3.6    | 4.79    | 6.69   | 4.29  | 4.29   | 6.56    | 6.57   | 3.57  | 3.57   | 5.23    | 5.38   | 3.57               | 3.57   | 4.79    | 5.38   |
| 2b1z               | 238                     | 9                      | 0.91  | 1.15   | 1.31    | 1.5    | 2.28  | 2.51   | 2.52    | 3.46   | 0.82  | 1.05   | 1.18    | 1.16   | 0.82               | 1.05   | 1.18    | 1.16   |
| 2b9h               | 337                     | 12                     | 5.19  | 9.46   | 9.7     | 10.71  | 2.57  | 2.9    | 3.11    | 2.96   | 4.53  | 4.53   | 14      | 21.87  | 2.57               | 2.9    | 3.11    | 2.96   |
| 2bba               | 185                     | 14                     | 4.08  | 4.79   | 6.87    | 7.1    | 3.53  | 3.65   | 5.17    | 5.26   | 3.91  | 4.58   | 5.41    | 5.57   | 3.53               | 3.65   | 5.17    | 5.26   |
| 2c3i               | 266                     | 8                      | 6.09  | 7.29   | 8.93    | 11.16  | 5.12  | 6.69   | 8.61    | 11.37  | 3.16  | 6.05   | 9.94    | 11.43  | 3.16               | 6.05   | 8.61    | 11.16  |
| 2cch               | 256                     | 12                     | 6.04  | 7.77   | 10.11   | 12.51  | 4.38  | 5.26   | 11.49   | 11.47  | 3.36  | 7.15   | 11.11   | 26.01  | 3.36               | 5.26   | 10.11   | 11.47  |

| receptor<br>pdb id | receptor<br>length (AA) | peptide<br>length (AA) | Run 1 |        |         |        | Run 2 |        |         |        | Run 3 |        |         |        | best from all runs |        |         |        |
|--------------------|-------------------------|------------------------|-------|--------|---------|--------|-------|--------|---------|--------|-------|--------|---------|--------|--------------------|--------|---------|--------|
|                    |                         |                        | all   | top 1k | top 100 | top 10 | all   | top 1k | top 100 | top 10 | all   | top 1k | top 100 | top 10 | all                | top 1k | top 100 | top 10 |
| 2d0n               | 56                      | 9                      | 3.41  | 3.66   | 4.42    | 6.02   | 3.27  | 3.67   | 4.23    | 4.68   | 2.64  | 2.64   | 4.22    | 5.64   | 2.64               | 2.64   | 4.22    | 4.68   |
| 2d5w               | 602                     | 5                      | 18.64 | 19.17  | 19.48   | 21.23  | 17.99 | 18.59  | 20.08   | 20.39  | 18.52 | 18.52  | 19.65   | 20.13  | 17.99              | 18.52  | 19.48   | 20.13  |
| 2ds8               | 41                      | 6                      | 4.97  | 4.97   | 10.05   | 9.46   | 3.25  | 3.25   | 8.87    | 9.77   | 2.15  | 2.15   | 5.45    | 9.42   | 2.15               | 2.15   | 5.45    | 9.42   |
| 2dze               | 320                     | 6                      | 2.39  | 2.71   | 2.71    | 3.13   | 2.82  | 2.97   | 3.23    | 3.59   | 7.08  | 7.45   | 7.8     | 8.58   | 2.39               | 2.71   | 2.71    | 3.13   |
| 2fgr               | 332                     | 8                      | 6.29  | 13.42  | 14.19   | 15.87  | 9.8   | 13.72  | 14.8    | 16.07  | 4.96  | 13.75  | 13.75   | 16.49  | 4.96               | 13.42  | 13.75   | 15.87  |
| 2fmf               | 128                     | 13                     | 2.87  | 2.87   | 7.07    | 7.5    | 4.46  | 4.64   | 6.09    | 7.18   | 4.77  | 5.14   | 5.92    | 6.43   | 2.87               | 2.87   | 5.92    | 6.43   |
| 2fnt               | 198                     | 7                      | 0.76  | 0.8    | 0.8     | 1.12   | 4.94  | 4.94   | 4.98    | 5.68   | 8.72  | 8.72   | 8.72    | 10.73  | 0.76               | 0.8    | 0.8     | 1.12   |
| 2foj               | 137                     | 7                      | 3.29  | 3.73   | 3.94    | 5.97   | 2.65  | 2.92   | 4.34    | 4.4    | 5.38  | 5.38   | 8.06    | 13.62  | 2.65               | 2.92   | 3.94    | 4.4    |
| 2fvj               | 258                     | 10                     | 1.62  | 1.82   | 1.82    | 2.43   | 1.46  | 1.46   | 1.46    | 3.49   | 1.73  | 2.86   | 3.31    | 3.66   | 1.46               | 1.46   | 1.46    | 2.43   |
| 2h9m               | 304                     | 5                      | 1.79  | 1.8    | 1.8     | 4.42   | 3.1   | 3.1    | 3.43    | 4.96   | 1.36  | 3      | 3.22    | 4.86   | 1.36               | 1.8    | 1.8     | 4.42   |
| 2ho2               | 33                      | 10                     | 4.32  | 6.62   | 8.82    | 15.21  | 3.94  | 4.89   | 6.48    | 7.04   | 3.8   | 5.63   | 6.33    | 5.59   | 3.8                | 4.89   | 6.33    | 5.59   |
| 2hpl               | 100                     | 5                      | 1.28  | 2.66   | 3.45    | 3.94   | 1.99  | 2.34   | 4.06    | 5.22   | 1.76  | 2.08   | 4       | 5.16   | 1.28               | 2.08   | 3.45    | 3.94   |
| 2ipu               | 442                     | 7                      | 5.04  | 5.5    | 6.47    | 8.75   | 7.4   | 7.57   | 9.74    | 17.13  | 5.42  | 7.49   | 11.56   | 10.82  | 5.04               | 5.5    | 6.47    | 8.75   |
| 2iv9               | 469                     | 9                      | 5.84  | 7.49   | 8.44    | 8.45   | 3.91  | 4.1    | 7.82    | 8.3    | 3.06  | 4.9    | 6.59    | 6.73   | 3.06               | 4.1    | 6.59    | 6.73   |
| 2j6f               | 57                      | 8                      | 2.96  | 5.25   | 11.17   | 11.37  | 3.33  | 3.49   | 3.95    | 5.29   | 2.98  | 3.73   | 4.42    | 5.37   | 2.96               | 3.49   | 3.95    | 5.29   |
| 2jam               | 279                     | 6                      | 4.98  | 7.86   | 12.7    | 15.99  | 4.34  | 7.51   | 11.81   | 17.2   | 6.16  | 8.41   | 12.8    | 13.62  | 4.34               | 7.51   | 11.81   | 13.62  |
| 2o02               | 224                     | 14                     | 3.99  | 5.54   | 6.41    | 6.68   | 3.97  | 4.08   | 4.86    | 4.92   | 3.54  | 3.71   | 4       | 5.19   | 3.54               | 3.71   | 4       | 4.92   |
| 2o4j               | 240                     | 12                     | 1.49  | 2.26   | 2.41    | 2.81   | 1.54  | 2.02   | 2.69    | 2.95   | 6.07  | 7.81   | 11.78   | 12.76  | 1.49               | 2.02   | 2.41    | 2.81   |
| 2o9v               | 67                      | 10                     | 3.64  | 3.85   | 5.4     | 6.6    | 3.76  | 4.35   | 5.36    | 9.44   | 3.38  | 3.73   | 4.6     | 5.39   | 3.38               | 3.73   | 4.6     | 5.39   |
| 2otu               | 233                     | 11                     | 4.33  | 4.33   | 16.41   | 15.01  | 3.15  | 4.24   | 6.09    | 8.79   | 4.57  | 7.24   | 16.38   | 21.54  | 3.15               | 4.24   | 6.09    | 8.79   |
| 2p0w               | 319                     | 15                     | 5.88  | 7.98   | 7.98    | 14.35  | 6.05  | 14.01  | 14.57   | 15.25  | 6.26  | 6.26   | 6.38    | 15.07  | 5.88               | 6.26   | 6.38    | 14.35  |
| 2p1k               | 87                      | 11                     | 3.52  | 4.76   | 5.27    | 5.38   | 6.33  | 9.82   | 10      | 10.33  | 2.47  | 2.47   | 3.06    | 4.08   | 2.47               | 2.47   | 3.06    | 4.08   |
| 2p1t               | 211                     | 10                     | 0.97  | 1.34   | 1.35    | 1.37   | 1.38  | 1.61   | 2.15    | 2.79   | 0.9   | 0.9    | 1.3     | 1.44   | 0.9                | 0.9    | 1.3     | 1.37   |
| 2p54               | 267                     | 12                     | 3.35  | 3.35   | 3.54    | 3.96   | 3.07  | 3.07   | 3.61    | 3.85   | 1.66  | 2.25   | 2.61    | 2.02   | 1.66               | 2.25   | 2.61    | 2.02   |
| 2puy               | 60                      | 10                     | 6.13  | 7.84   | 18.61   | 21.21  | 6.3   | 6.3    | 10.36   | 10.35  | 3.63  | 3.63   | 8.7     | 12.44  | 3.63               | 3.63   | 8.7     | 10.35  |
| 2pv2               | 206                     | 12                     | 2.27  | 2.27   | 3.6     | 3.77   | 3.26  | 3.81   | 4.73    | 5.82   | 1.72  | 1.72   | 1.72    | 4.43   | 1.72               | 1.72   | 1.72    | 3.77   |
| 2qos               | 173                     | 11                     | 3.11  | 4.16   | 6.57    | 6.88   | 3.53  | 4.83   | 5.87    | 6.79   | 3.17  | 3.94   | 4.65    | 5.76   | 3.11               | 3.94   | 4.65    | 5.76   |
| 2r7g               | 337                     | 10                     | 1.47  | 1.62   | 1.62    | 3.33   | 2.34  | 2.85   | 3.53    | 4.97   | 2.94  | 3.7    | 4.03    | 5.09   | 1.47               | 1.62   | 1.62    | 3.33   |
| 2v3s               | 96                      | 6                      | 2.42  | 2.42   | 3.48    | 8.89   | 1.83  | 1.83   | 5.01    | 7.24   | 1.05  | 1.09   | 1.74    | 2      | 1.05               | 1.09   | 1.74    | 2      |
| 2vj0               | 246                     | 8                      | 2.09  | 2.96   | 4.12    | 3.91   | 3.83  | 8      | 21.4    | 21.43  | 3.57  | 5.07   | 6.5     | 7.75   | 2.09               | 2.96   | 4.12    | 3.91   |
| 2zjd               | 121                     | 10                     | 2.35  | 2.69   | 2.79    | 4.6    | 1.77  | 1.83   | 1.91    | 3.78   | 1.57  | 1.58   | 2.27    | 3.7    | 1.57               | 1.58   | 1.91    | 3.7    |
| 3bfq               | 132                     | 15                     | 10.2  | 11.53  | 14.22   | 13.48  | 1.24  | 1.41   | 1.83    | 2.58   | 11.81 | 18.52  | 21.98   | 23.03  | 1.24               | 1.41   | 1.83    | 2.58   |
| 3bu3               | 297                     | 14                     | 6.87  | 7.06   | 7.71    | 8.86   | 5.77  | 5.77   | 10.23   | 11.07  | 6.12  | 10.01  | 10.01   | 10.42  | 5.77               | 5.77   | 7.71    | 8.86   |
| 3bwa               | 276                     | 8                      | 2.42  | 2.75   | 3.17    | 3.94   | 2.39  | 2.51   | 2.98    | 3.2    | 1.83  | 2.7    | 3.19    | 3.65   | 1.83               | 2.51   | 2.98    | 3.2    |
| 3cvp               | 279                     | 6                      | 4.52  | 4.67   | 8.47    | 10.14  | 3.07  | 4.97   | 5.68    | 7.59   | 3.08  | 4.25   | 5.49    | 8.02   | 3.07               | 4.25   | 5.49    | 7.59   |

| receptor<br>pdb id | receptor<br>length (AA) | peptide<br>length (AA) | Run 1       |             |             |             | Run 2       |             |             |             | Run 3       |             |             |             | best from all runs |             |             |             |
|--------------------|-------------------------|------------------------|-------------|-------------|-------------|-------------|-------------|-------------|-------------|-------------|-------------|-------------|-------------|-------------|--------------------|-------------|-------------|-------------|
|                    |                         |                        | all         | top 1k      | top 100     | top 10      | all         | top 1k      | top 100     | top 10      | all         | top 1k      | top 100     | top 10      | all                | top 1k      | top 100     | top 10      |
| 3d1e               | 366                     | 6                      | 4.39        | 6.59        | 8.18        | 18.82       | 3.44        | 3.44        | 9.96        | 8.93        | 2.57        | 2.57        | 9.88        | 12.21       | 2.57               | 2.57        | 8.18        | 8.93        |
| 3d9t               | 95                      | 6                      | 3.56        | 4.34        | 7.25        | 10.06       | 3.12        | 4.28        | 7.25        | 9.16        | 3.02        | 3.91        | 11.05       | 15.91       | 3.02               | 3.91        | 7.25        | 9.16        |
| <b>MEAN</b>        | <b>204.81</b>           | <b>9.17</b>            | <b>4.41</b> | <b>5.53</b> | <b>7.32</b> | <b>9.11</b> | <b>4.38</b> | <b>5.32</b> | <b>7.13</b> | <b>8.52</b> | <b>4.38</b> | <b>5.71</b> | <b>7.49</b> | <b>9.26</b> | <b>3.61</b>        | <b>4.32</b> | <b>5.62</b> | <b>6.90</b> |

**Table S2. CABS-dock performance for 68 unbound cases (listed in rows) in 3 independent prediction runs (shown in separate columns). The table shows the lowest ligand-RMSD values (calculated on the peptide only after superimposition of the receptor structures) among: all 10,000 models (all), top 1000 models (top 1k, selected during filtering and clustering procedure), top 100 models (top 100, selected through further clustering) and top 10 final models (top 10). Last column shows the lowest RMSD values obtained in three prediction runs.**

| pdb<br>code | receptor<br>length (AA) | peptide<br>length (AA) | run 1 |        |         |        | run 2 |        |         |        | run 3 |        |         |        | best from 3 runs |        |         |        |
|-------------|-------------------------|------------------------|-------|--------|---------|--------|-------|--------|---------|--------|-------|--------|---------|--------|------------------|--------|---------|--------|
|             |                         |                        | all   | top 1k | top 100 | top 10 | all   | top 1k | top 100 | top 10 | all   | top 1k | top 100 | top 10 | all              | top 1k | top 100 | top 10 |
| 1alv        | 173                     | 11                     | 1.99  | 2.55   | 3.6     | 3.32   | 2.83  | 3.24   | 3.73    | 4.87   | 1.68  | 2.12   | 3.2     | 2.47   | 1.68             | 2.12   | 3.2     | 2.47   |
| 1b9k        | 246                     | 8                      | 3.38  | 6.89   | 9.74    | 9.95   | 4.07  | 10.06  | 14.05   | 22.2   | 4.74  | 6.18   | 10.07   | 10.59  | 3.38             | 6.18   | 9.74    | 9.95   |
| 1czz        | 168                     | 7                      | 2.56  | 2.56   | 3.62    | 3.81   | 2.03  | 2.33   | 2.58    | 3.21   | 2.06  | 2.83   | 3.15    | 5.68   | 2.03             | 2.33   | 2.58    | 3.21   |
| 1d1z        | 104                     | 11                     | 5.26  | 5.26   | 7.09    | 7.48   | 5.11  | 5.59   | 6.85    | 10.01  | 5.17  | 5.33   | 7.21    | 8.02   | 5.11             | 5.26   | 6.85    | 7.48   |
| 1eg3        | 260                     | 13                     | 6.17  | 10.8   | 14.45   | 16.05  | 6.67  | 8.44   | 12.43   | 22.77  | 7.47  | 9.46   | 14.72   | 15.02  | 6.17             | 8.44   | 12.43   | 15.02  |
| 1go5        | 59                      | 9                      | 3.38  | 3.92   | 4.92    | 5.22   | 2.89  | 3.4    | 3.65    | 4.66   | 4.17  | 4.67   | 11.15   | 12.66  | 2.89             | 3.4    | 3.65    | 4.66   |
| 1gy7        | 122                     | 5                      | 3.73  | 7.64   | 13.05   | 13.73  | 6.01  | 7.96   | 12.23   | 15.15  | 4.46  | 4.59   | 12.19   | 13.71  | 3.73             | 4.59   | 12.19   | 13.71  |
| 1h1r        | 256                     | 12                     | 4.37  | 4.92   | 7.09    | 6.55   | 4.42  | 5.04   | 10.24   | 10.18  | 3.86  | 6.12   | 7.99    | 8.03   | 3.86             | 4.92   | 7.09    | 6.55   |
| 1i2h        | 104                     | 6                      | 2.71  | 3.33   | 3.95    | 4.31   | 3.77  | 3.77   | 8.36    | 10.09  | 3.29  | 3.33   | 4.64    | 4.63   | 2.71             | 3.33   | 3.95    | 4.31   |
| 1i7g        | 267                     | 12                     | 1.68  | 2.01   | 2.87    | 7.9    | 2.26  | 2.47   | 2.78    | 3.38   | 1.75  | 1.83   | 1.83    | 1.87   | 1.68             | 1.83   | 1.83    | 1.87   |
| 1ie9        | 240                     | 12                     | 6.93  | 11.86  | 13.99   | 23.44  | 4.85  | 7.75   | 10.22   | 12.85  | 6.88  | 10.98  | 12.36   | 15.34  | 4.85             | 7.75   | 10.22   | 12.85  |
| 1jbe        | 128                     | 13                     | 4.84  | 5.44   | 5.75    | 6.08   | 4.52  | 5.76   | 5.92    | 6.44   | 4.37  | 4.58   | 7.97    | 10.79  | 4.37             | 4.58   | 5.75    | 6.08   |
| 1jwf        | 140                     | 5                      | 2.17  | 3.89   | 4.46    | 4.7    | 2.52  | 2.52   | 4.94    | 5.71   | 2.35  | 2.46   | 4.24    | 5.96   | 2.17             | 2.46   | 4.24    | 4.7    |
| 1jwt        | 250                     | 6                      | 9.44  | 14.28  | 17.25   | 17.23  | 8.68  | 11.8   | 14.42   | 15.36  | 9.8   | 14.08  | 17.4    | 19.47  | 8.68             | 11.8   | 14.42   | 15.36  |
| 1lf7        | 173                     | 11                     | 5.68  | 7.47   | 7.6     | 7.74   | 4.1   | 4.97   | 4.98    | 4.83   | 4.89  | 5.53   | 6.87    | 7.59   | 4.1              | 4.97   | 4.98    | 4.83   |
| 1lvb        | 229                     | 7                      | 5.73  | 7.41   | 13.21   | 18.56  | 5.73  | 13.74  | 14.39   | 18.3   | 7.12  | 7.12   | 15.6    | 17.56  | 5.73             | 7.12   | 13.21   | 17.56  |
| 1m7d        | 435                     | 8                      | 5.61  | 6.35   | 7.4     | 13.37  | 5.29  | 5.84   | 6.78    | 13.62  | 3.94  | 4.67   | 5.5     | 5.89   | 3.94             | 4.67   | 5.5     | 5.89   |
| 1n7e        | 86                      | 8                      | 4.79  | 4.79   | 8.03    | 11.97  | 4.08  | 8.01   | 11.44   | 11.26  | 3.79  | 6.19   | 10.49   | 16.36  | 3.79             | 4.79   | 8.03    | 11.26  |
| 1n83        | 244                     | 10                     | 1.12  | 1.13   | 1.13    | 2.39   | 2.73  | 2.73   | 3.74    | 3.84   | 1.48  | 3.56   | 8.3     | 8.56   | 1.12             | 1.13   | 1.13    | 2.39   |
| 1oew        | 330                     | 8                      | 7.92  | 8.65   | 9.87    | 10.63  | 5.72  | 8.05   | 8.09    | 9.18   | 6.58  | 6.58   | 7.84    | 9      | 5.72             | 6.58   | 7.84    | 9      |
| 1oot        | 60                      | 11                     | 3.43  | 4.62   | 5.97    | 6.97   | 4.27  | 4.97   | 6.1     | 6.9    | 3.97  | 4.62   | 5.73    | 7.12   | 3.43             | 4.62   | 5.73    | 6.9    |
| 1ou9        | 106                     | 8                      | 3.58  | 4.21   | 4.97    | 6.78   | 3.64  | 3.64   | 4.93    | 11.23  | 3.25  | 4.56   | 4.81    | 5.18   | 3.25             | 3.64   | 4.81    | 5.18   |
| 1pyw        | 369                     | 15                     | 3.62  | 3.65   | 3.79    | 4.68   | 4.62  | 5.23   | 5.54    | 5.8    | 3.93  | 5.5    | 5.55    | 6.33   | 3.62             | 3.65   | 3.79    | 4.68   |
| 1qbh        | 105                     | 8                      | 4.72  | 7.01   | 9.44    | 13.51  | 5.44  | 6      | 8.96    | 12.8   | 6.09  | 6.09   | 8.51    | 10.44  | 4.72             | 6      | 8.51    | 10.44  |
| 1r6j        | 164                     | 5                      | 2.52  | 2.52   | 8.26    | 9.3    | 3.21  | 3.23   | 5.43    | 8.31   | 3.2   | 3.72   | 4.94    | 8.47   | 2.52             | 2.52   | 4.94    | 8.31   |
| 1rwz        | 245                     | 11                     | 6.17  | 10.34  | 11.2    | 23.02  | 4.71  | 4.71   | 8.11    | 19.96  | 4.73  | 4.89   | 6.67    | 7.61   | 4.71             | 4.71   | 6.67    | 7.61   |
| 1tq3        | 115                     | 6                      | 1.4   | 1.4    | 3.57    | 6.44   | 3.58  | 5.63   | 7.34    | 7.39   | 2.62  | 2.62   | 4.7     | 9.68   | 1.4              | 1.4    | 3.57    | 6.44   |
| 1um5        | 431                     | 8                      | 3.05  | 3.05   | 3.34    | 3.93   | 3.54  | 3.54   | 5.67    | 4.78   | 4.32  | 4.32   | 5.89    | 7.93   | 3.05             | 3.05   | 3.34    | 3.93   |
| 1utn        | 223                     | 14                     | 7.74  | 8.46   | 8.73    | 12.33  | 6.95  | 7.66   | 8.69    | 10.88  | 7.27  | 7.91   | 9.31    | 10.01  | 6.95             | 7.66   | 8.69    | 10.01  |
| 1v49        | 121                     | 10                     | 2.69  | 2.69   | 2.91    | 4.02   | 2.19  | 2.56   | 2.73    | 3.45   | 2.89  | 2.89   | 4.23    | 5.5    | 2.19             | 2.56   | 2.73    | 3.45   |
| 1x2j        | 290                     | 9                      | 3.92  | 5.08   | 5.42    | 6      | 3.44  | 3.68   | 5.17    | 5.89   | 3.57  | 4.92   | 5.81    | 6.54   | 3.44             | 3.68   | 5.17    | 5.89   |

| pdb code | receptor length (AA) | peptide length (AA) | run 1 |        |         |        | run 2 |        |         |        | run 3 |        |         |        | best from 3 runs |        |         |        |
|----------|----------------------|---------------------|-------|--------|---------|--------|-------|--------|---------|--------|-------|--------|---------|--------|------------------|--------|---------|--------|
|          |                      |                     | all   | top 1k | top 100 | top 10 | all   | top 1k | top 100 | top 10 | all   | top 1k | top 100 | top 10 | all              | top 1k | top 100 | top 10 |
| 1y0m     | 55                   | 10                  | 3.92  | 4.97   | 5.73    | 7.03   | 3.53  | 4.83   | 5.45    | 6.21   | 4     | 5.24   | 5.84    | 8.13   | 3.53             | 4.83   | 5.45    | 6.21   |
| 1yej     | 442                  | 7                   | 4.67  | 5.2    | 10.97   | 19.17  | 5.31  | 6.37   | 8.26    | 12.12  | 4.05  | 5.94   | 8.05    | 7.67   | 4.05             | 5.2    | 8.05    | 7.67   |
| 1z1m     | 88                   | 9                   | 2.76  | 3.46   | 3.72    | 4.68   | 3.31  | 3.48   | 5.26    | 4.54   | 3.39  | 3.52   | 3.75    | 3.62   | 2.76             | 3.46   | 3.72    | 3.62   |
| 1z9l     | 238                  | 9                   | 4.24  | 5.32   | 6.68    | 8.65   | 4.18  | 4.87   | 5.84    | 6.91   | 3.8   | 4.84   | 4.91    | 5.08   | 3.8              | 4.84   | 4.91    | 5.08   |
| 2aa2     | 253                  | 12                  | 1.84  | 2      | 2.95    | 3.12   | 2.32  | 2.52   | 2.54    | 2.95   | 1.73  | 2.39   | 2.85    | 4.12   | 1.73             | 2      | 2.54    | 2.95   |
| 2abx     | 74                   | 13                  | 6.14  | 7.58   | 10.07   | 10.19  | 6.5   | 7.22   | 7.96    | 8.76   | 8.02  | 9.53   | 10.21   | 11.18  | 6.14             | 7.22   | 7.96    | 8.76   |
| 2alf     | 164                  | 6                   | 1.74  | 2.42   | 2.7     | 4.1    | 2.17  | 2.29   | 3.38    | 3.46   | 1.8   | 1.81   | 2.75    | 2.55   | 1.74             | 1.81   | 2.7     | 2.55   |
| 2am9     | 250                  | 10                  | 1.52  | 1.58   | 1.69    | 2.14   | 1.57  | 1.93   | 2.6     | 2.22   | 1.21  | 1.76   | 2.36    | 2.66   | 1.21             | 1.58   | 1.69    | 2.14   |
| 2b9f     | 337                  | 12                  | 2.44  | 2.66   | 3.52    | 3.86   | 3.85  | 3.85   | 6.1     | 12.32  | 2.33  | 3.62   | 4.09    | 4.16   | 2.33             | 2.66   | 3.52    | 3.86   |
| 2bz6     | 239                  | 15                  | 8.03  | 16.66  | 18.28   | 22.88  | 7.76  | 16.35  | 21.5    | 23.07  | 6     | 9.88   | 10.72   | 10.51  | 6                | 9.88   | 10.72   | 10.51  |
| 2ds7     | 41                   | 6                   | 5.64  | 5.64   | 11.31   | 11.24  | 5.44  | 7.26   | 10.81   | 11.85  | 3.63  | 7.09   | 10.38   | 12.17  | 3.63             | 5.64   | 10.38   | 11.24  |
| 2dvj     | 57                   | 9                   | 2.82  | 3.29   | 5.09    | 7.7    | 2.96  | 3.3    | 5.85    | 6.15   | 3.35  | 5.1    | 6.38    | 7.2    | 2.82             | 3.29   | 5.09    | 6.15   |
| 2e45     | 33                   | 10                  | 4.43  | 5.35   | 7.11    | 17.03  | 3.38  | 5.57   | 7.04    | 14.19  | 4.07  | 7.35   | 7.97    | 10.34  | 3.38             | 5.35   | 7.04    | 10.34  |
| 2f1w     | 137                  | 7                   | 2.82  | 7.32   | 7.68    | 7.82   | 3.36  | 4.93   | 5.65    | 6.91   | 3.32  | 3.35   | 3.35    | 7.82   | 2.82             | 3.35   | 3.35    | 6.91   |
| 2fgq     | 332                  | 8                   | 7.95  | 14.74  | 15.97   | 17.58  | 10.19 | 13.38  | 16.67   | 17.32  | 7.73  | 13.64  | 14.87   | 14.82  | 7.73             | 13.38  | 14.87   | 14.82  |
| 2g6f     | 64                   | 8                   | 3.44  | 3.44   | 6.45    | 6.64   | 3.25  | 4.5    | 5.08    | 4.94   | 3.26  | 5.11   | 6.14    | 7.71   | 3.25             | 3.44   | 5.08    | 4.94   |
| 2h14     | 304                  | 5                   | 2.55  | 2.94   | 3.4     | 4.26   | 2.57  | 3.09   | 3.09    | 4.7    | 2.28  | 2.28   | 3.73    | 4.42   | 2.28             | 2.28   | 3.09    | 4.26   |
| 2h3l     | 95                   | 9                   | 4.36  | 4.66   | 6.77    | 12.2   | 4.96  | 4.96   | 14.76   | 14.9   | 3.54  | 4.71   | 4.71    | 9.11   | 3.54             | 4.66   | 4.71    | 9.11   |
| 2hpj     | 100                  | 5                   | 1.64  | 3.33   | 3.83    | 6.03   | 2.1   | 2.17   | 3.37    | 4.58   | 2.35  | 3.18   | 3.77    | 4.91   | 1.64             | 2.17   | 3.37    | 4.58   |
| 2hwq     | 258                  | 10                  | 2.25  | 2.82   | 3.31    | 2.78   | 1.16  | 1.6    | 2.29    | 2.68   | 1.17  | 1.17   | 1.36    | 1.49   | 1.16             | 1.17   | 1.36    | 1.49   |
| 2i3i     | 95                   | 6                   | 3.85  | 6.18   | 7.06    | 15.82  | 4.03  | 4.03   | 6.82    | 17.23  | 3.36  | 8.39   | 9.27    | 9.4    | 3.36             | 4.03   | 6.82    | 9.4    |
| 2iog     | 238                  | 9                   | 9.98  | 10.51  | 14.36   | 23.02  | 8.77  | 10.68  | 13.32   | 21.29  | 9.46  | 10.35  | 15.22   | 20.05  | 8.77             | 10.35  | 13.32   | 20.05  |
| 2j2i     | 266                  | 8                   | 3.06  | 4.03   | 10.45   | 11.4   | 3.75  | 6.46   | 8.73    | 11.68  | 3.92  | 6.3    | 9.38    | 11.1   | 3.06             | 4.03   | 8.73    | 11.1   |
| 2j6k     | 57                   | 8                   | 3.27  | 3.8    | 4.07    | 7.3    | 2.98  | 3.39   | 3.39    | 5.62   | 2.77  | 3.06   | 3.34    | 4.03   | 2.77             | 3.06   | 3.34    | 4.03   |
| 2o9s     | 67                   | 10                  | 3.24  | 3.86   | 5.01    | 6.96   | 3.23  | 4.87   | 5.68    | 6.36   | 3.92  | 4.36   | 5.48    | 6.85   | 3.23             | 3.86   | 5.01    | 6.36   |
| 2qbh     | 95                   | 6                   | 5.11  | 5.99   | 9.29    | 10.33  | 5.21  | 6.29   | 14.34   | 14.67  | 5.03  | 5.03   | 7.98    | 12.62  | 5.03             | 5.03   | 7.98    | 10.33  |
| 2qhn     | 264                  | 5                   | 4.9   | 6.27   | 7.28    | 9.16   | 3.74  | 3.87   | 7.1     | 5.22   | 4.62  | 5.12   | 8.55    | 9.79   | 3.74             | 3.87   | 7.1     | 5.22   |
| 2rtm     | 120                  | 6                   | 4.44  | 5.13   | 6.41    | 6.93   | 5.28  | 5.57   | 5.96    | 6.79   | 5.09  | 5.25   | 6.2     | 6.49   | 4.44             | 5.13   | 5.96    | 6.49   |
| 2yql     | 60                   | 10                  | 4.57  | 4.99   | 6.49    | 7.59   | 3.29  | 3.29   | 7.69    | 9.57   | 6.5   | 7.18   | 8.39    | 13.12  | 3.29             | 3.29   | 6.49    | 7.59   |
| 3d1g     | 366                  | 6                   | 2.73  | 2.73   | 7.04    | 9      | 7.61  | 14.02  | 14.54   | 15.3   | 3.79  | 6.23   | 11.18   | 6.88   | 2.73             | 2.73   | 7.04    | 6.88   |
| 3ekk     | 297                  | 14                  | 8.03  | 9.61   | 10.36   | 11.6   | 6.91  | 7.01   | 7.11    | 8.56   | 4.41  | 6.57   | 10.22   | 9.96   | 4.41             | 6.57   | 7.11    | 8.56   |
| 3hau     | 198                  | 7                   | 8.66  | 10.03  | 10.04   | 11.73  | 6.24  | 6.24   | 6.8     | 7      | 8.11  | 8.34   | 8.36    | 9.08   | 6.24             | 6.24   | 6.8     | 7      |
| 3nsq     | 211                  | 10                  | 3.19  | 4.38   | 6.44    | 10.29  | 2.82  | 3.91   | 4.37    | 8.73   | 2.4   | 2.64   | 3.76    | 5.76   | 2.4              | 2.64   | 3.76    | 5.76   |
| 3pom     | 337                  | 10                  | 3.59  | 3.59   | 3.59    | 6.69   | 3.99  | 4.61   | 5.26    | 8.79   | 2.17  | 2.17   | 3.89    | 6.42   | 2.17             | 2.17   | 3.59    | 6.42   |
| 3rdh     | 224                  | 14                  | 3.79  | 4.13   | 6.16    | 6.95   | 3.58  | 3.93   | 4.24    | 6.28   | 3.88  | 3.91   | 4.88    | 4.96   | 3.58             | 3.91   | 4.24    | 4.96   |



| pdb<br>code | receptor<br>length (AA) | peptide<br>length (AA) | run 1       |             |             |             | run 2       |             |             |             | run 3       |             |             |             | best from 3 runs |             |             |             |
|-------------|-------------------------|------------------------|-------------|-------------|-------------|-------------|-------------|-------------|-------------|-------------|-------------|-------------|-------------|-------------|------------------|-------------|-------------|-------------|
|             |                         |                        | all         | top 1k      | top 100     | top 10      | all         | top 1k      | top 100     | top 10      | all         | top 1k      | top 100     | top 10      | all              | top 1k      | top 100     | top 10      |
| 3siq        | 97                      | 7                      | 5.08        | 5.08        | 9.61        | 10.19       | 7.67        | 7.67        | 8.73        | 15.02       | 8.65        | 8.65        | 8.65        | 14.31       | 5.08             | 5.08        | 8.65        | 10.19       |
| 3tx7        | 240                     | 14                     | 4.01        | 5.77        | 11.11       | 12.75       | 4.14        | 5.07        | 5.28        | 8.25        | 3.22        | 3.69        | 8.73        | 12.59       | 3.22             | 3.69        | 5.28        | 8.25        |
| <b>MEAN</b> | <b>191.71</b>           | <b>9.07</b>            | <b>4.25</b> | <b>5.52</b> | <b>7.33</b> | <b>9.53</b> | <b>4.37</b> | <b>5.58</b> | <b>7.40</b> | <b>9.59</b> | <b>4.24</b> | <b>5.34</b> | <b>7.21</b> | <b>8.63</b> | <b>3.68</b>      | <b>4.49</b> | <b>6.14</b> | <b>7.32</b> |

**Table S3. PDB codes of receptor pairs (in bound and unbound form).**

| <b>bound form<br/>pdb code</b> | <b>unbound form<br/>pdb code</b> |
|--------------------------------|----------------------------------|
| 1awr                           | 2alf                             |
| 1ce1                           | 1um5                             |
| 1cka                           | 2dvj                             |
| 1czy                           | 1czz                             |
| 1d4t                           | 1d1z                             |
| 1ddv                           | 1i2h                             |
| 1eg4                           | 1eg3                             |
| 1er8                           | 1oew                             |
| 1gyb                           | 1gy7                             |
| 1hc9                           | 2abx                             |
| 1jbu                           | 2bz6                             |
| 1jd5                           | 1qbh                             |
| 1jwg                           | 1jwf                             |
| 1kl3                           | 2rtm                             |
| 1klu                           | 1pyw                             |
| 1lvm                           | 1lvb                             |
| 1mfg                           | 2h3l                             |
| 1n7f                           | 1n7e                             |
| 1nq7                           | 1n83                             |
| 1nvr                           | 2qhn                             |
| 1nx1                           | 1alv                             |
| 1oai                           | 1go5                             |
| 1ou8                           | 1ou9                             |
| 1pz5                           | 1m7d                             |
| 1rxz                           | 1rwz                             |

|      |      |
|------|------|
| 1se0 | 3siq |
| 1sfi | 1utn |
| 1ssh | 1oot |
| 1t4f | 1z1m |
| 1t7r | 2am9 |
| 1tp5 | 1tq3 |
| 1tw6 | 2i3i |
| 1vzq | 1jwt |
| 1w9e | 1r6j |
| 1x2r | 1x2j |
| 1yuc | 3tx7 |
| 1ywo | 1y0m |
| 1z9o | 1z9l |
| 2a3i | 2aa2 |
| 2ak5 | 2g6f |
| 2b1z | 2iog |
| 2b9h | 2b9f |
| 2c3i | 2j2i |
| 2cch | 1h1r |
| 2ds8 | 2ds7 |
| 2fgr | 2fgq |
| 2fmf | 1jbe |
| 2fnt | 3hau |
| 2foj | 2f1w |
| 2fvj | 2hwq |
| 2h9m | 2h14 |
| 2ho2 | 2e45 |
| 2hpl | 2hpi |
| 2ipu | 1yej |

|      |      |
|------|------|
| 2j6f | 2j6k |
| 2o02 | 3rdh |
| 2o4j | 1ie9 |
| 2o9v | 2o9s |
| 2p1t | 3nsq |
| 2p54 | 1i7g |
| 2puy | 2yql |
| 2qos | 1lf7 |
| 2r7g | 3pom |
| 2vj0 | 1b9k |
| 2zjd | 1v49 |
| 3bu3 | 3ekk |
| 3d1e | 3d1g |
| 3d9t | 2qbh |
